# Supplementary material for: Restriction of Francisella novicida Genetic Diversity during Infection of the Vector Midgut
Source: PubMed Central journal article supplement (PMC4231110; doi:10.1371/journal.ppat.1004499), 2014-11-13
Supplement: ppat.1004499.s007.pdf [file ppat.1004499.s007.pdf]

| <i>F. novicida</i> transposon mutant | <i>F. novicida</i> locus tag | Pool A | Pool B | Pool C | Pool D | Pool E | Individual |
|--------------------------------------|------------------------------|--------|--------|--------|--------|--------|------------|
| tnfn1_pw060510p03q102                | FTN_1172                     | X      |        |        |        |        |            |
| tnfn1_pw060510p03q103                | FTN_0526                     | X      |        |        |        |        |            |
| tnfn1_pw060510p03q104                | FTN_0462                     | X      |        |        |        |        |            |
| tnfn1_pw060510p03q105                | FTN_1739                     | X      |        |        |        |        |            |
| tnfn1_pw060510p03q106                | FTN_1359                     | X      |        | X      |        |        |            |
| tnfn1_pw060510p03q107                | FTN_1427                     | X      |        |        |        |        |            |
| tnfn1_pw060510p03q108                | FTN_0084                     | X      |        |        |        |        |            |
| tnfn1_pw060510p03q109                | FTN_1486                     | X      |        |        |        |        |            |
| tnfn1_pw060510p03q110                | FTN_1727                     | X      |        |        |        |        |            |
| tnfn1_pw060510p03q111                | FTN_0515                     | X      |        |        |        |        |            |
| tnfn1_pw060510p03q112                | FTN_0841                     | X      |        | X      |        |        |            |
| tnfn1_pw060510p03q113                | FTN_0669                     | X      |        | X      |        |        |            |
| tnfn1_pw060510p03q114                | FTN_0284                     | X      |        |        |        |        |            |
| tnfn1_pw060510p03q115                | FTN_0625                     | X      |        |        |        |        |            |
| tnfn1_pw060510p03q116                | intergenic                   | X      |        |        |        |        |            |
| tnfn1_pw060510p03q117                | FTN_0143                     | X      |        | X      |        |        |            |
| tnfn1_pw060510p03q118                | FTN_1717                     | X      |        |        |        |        |            |
| tnfn1_pw060510p03q119                | FTN_0806                     | X      |        |        |        |        |            |
| tnfn1_pw060510p03q120                | FTN_0303                     | X      |        | X      |        |        |            |
| tnfn1_pw060510p03q121                | FTN_1699                     | X      |        |        |        |        |            |
| tnfn1_pw060510p03q122                | FTN_1229                     | X      |        | X      |        |        |            |
| tnfn1_pw060510p03q123                | FTN_1177                     | X      |        |        |        |        |            |
| tnfn1_pw060510p03q124                | FTN_0399                     | X      |        |        |        |        |            |
| tnfn1_pw060510p03q125                | FTN_0127                     | X      |        |        |        |        |            |
| tnfn1_pw060510p03q126                | FTN_0629                     | X      |        | X      |        |        |            |
| tnfn1_pw060510p03q127                | FTN_0619                     | X      |        |        |        |        |            |
| tnfn1_pw060510p03q128                | FTN_1418                     | X      |        |        |        |        |            |
| tnfn1_pw060510p03q129                | FTN_1060                     | X      |        |        |        |        |            |
| tnfn1_pw060510p03q130                | FTN_1107                     | X      |        |        |        |        |            |
| tnfn1_pw060510p03q131                | FTN_0521                     | X      |        |        |        |        |            |
| tnfn1_pw060510p03q132                | FTN_1463                     | X      |        | X      |        |        |            |
| tnfn1_pw060510p03q133                | FTN_1726                     | X      |        |        |        |        |            |
| tnfn1_pw060510p03q134                | FTN_0657                     | X      |        |        |        |        |            |
| tnfn1_pw060510p03q135                | FTN_1254                     | X      |        |        |        |        |            |
| tnfn1_pw060510p03q136                | intergenic                   | X      |        |        |        |        |            |
| tnfn1_pw060510p03q137                | FTN_0070                     | X      |        |        |        |        |            |
| tnfn1_pw060510p03q139                | FTN_0969                     | X      |        |        |        |        |            |
| tnfn1_pw060510p03q140                | FTN_0741                     | X      |        |        |        |        |            |
| tnfn1_pw060510p03q141                | FTN_1493                     | X      |        |        |        |        |            |
| tnfn1_pw060510p03q142                | FTN_0533                     | X      |        |        |        |        |            |
| tnfn1_pw060510p03q143                | FTN_1356                     | X      |        | X      |        |        | Genotype 1 |
| tnfn1_pw060510p03q144                | FTN_0171                     | X      |        |        |        |        |            |
| tnfn1_pw060510p03q145                | FTN_1309                     | X      |        |        |        |        |            |
| tnfn1_pw060510p03q146                | FTN_1152                     | X      |        |        |        |        |            |
| tnfn1_pw060510p03q147                | FTN_1063                     | X      |        |        |        |        |            |
| tnfn1_pw060510p03q148                | FTN_1176                     | X      |        |        |        |        |            |
| tnfn1_pw060510p03q149                | FTN_1168                     | X      |        |        |        |        |            |
| tnfn1_pw060510p03q150                | FTN_0949                     | X      |        | X      |        |        |            |
| tnfn1_pw060510p03q151                | FTN_0583                     | X      |        |        |        |        |            |
| tnfn1_pw060510p03q152                | FTN_0674                     | X      |        |        |        |        |            |
| tnfn1_pw060510p03q153                | FTN_1372                     | X      |        | X      |        |        |            |
| tnfn1_pw060510p03q154                | FTN_0516                     | X      |        |        |        |        |            |

|                       |          |   |   |            |
|-----------------------|----------|---|---|------------|
| tnfn1_pw060510p03q155 | FTN_0750 | X |   |            |
| tnfn1_pw060510p03q156 | FTN_0787 | X | X | Genotype 2 |
| tnfn1_pw060510p03q157 | FTN_0316 | X |   |            |
| tnfn1_pw060510p03q158 | FTN_1294 | X |   |            |
| tnfn1_pw060510p03q159 | FTN_1051 | X |   |            |
| tnfn1_pw060510p03q160 | FTN_1759 | X |   |            |
| tnfn1_pw060510p03q161 | FTN_0027 | X |   |            |
| tnfn1_pw060510p03q162 | FTN_0177 | X |   |            |
| tnfn1_pw060510p03q163 | FTN_0857 | X |   |            |
| tnfn1_pw060510p03q164 | FTN_0116 | X |   |            |
| tnfn1_pw060510p03q165 | FTN_0685 | X |   |            |
| tnfn1_pw060510p03q166 | FTN_1439 | X |   |            |
| tnfn1_pw060510p03q168 | FTN_0598 | X |   |            |
| tnfn1_pw060510p03q169 | FTN_0626 | X | X |            |
| tnfn1_pw060510p03q170 | FTN_0687 | X |   |            |
| tnfn1_pw060510p03q171 | FTN_0588 | X |   |            |
| tnfn1_pw060510p03q172 | FTN_0527 | X |   |            |
| tnfn1_pw060510p03q173 | FTN_1161 | X |   |            |
| tnfn1_pw060510p03q174 | FTN_1594 | X |   |            |
| tnfn1_pw060510p03q175 | FTN_1732 | X |   |            |
| tnfn1_pw060510p03q176 | FTN_0531 | X |   |            |
| tnfn1_pw060510p03q177 | FTN_0488 | X |   |            |
| tnfn1_pw060510p03q178 | FTN_0898 | X |   |            |
| tnfn1_pw060510p03q179 | FTN_1079 | X |   |            |
| tnfn1_pw060510p03q180 | FTN_0067 | X |   |            |
| tnfn1_pw060510p03q181 | FTN_1589 | X |   |            |
| tnfn1_pw060510p03q182 | FTN_0125 | X |   |            |
| tnfn1_pw060510p03q183 | FTN_1264 | X | X |            |
| tnfn1_pw060510p03q184 | FTN_1715 | X |   |            |
| tnfn1_pw060510p03q185 | FTN_1543 | X |   |            |
| tnfn1_pw060510p03q186 | FTN_1417 | X | X | Genotype 3 |
| tnfn1_pw060510p03q187 | FTN_0178 | X |   |            |
| tnfn1_pw060510p03q188 | FTN_0627 | X |   |            |
| tnfn1_pw060510p03q189 | FTN_0285 | X |   |            |
| tnfn1_pw060510p03q190 | FTN_0371 | X |   |            |
| tnfn1_pw060510p03q191 | FTN_0973 | X |   |            |
| tnfn1_pw060510p03q192 | FTN_1098 | X |   |            |
| tnfn1_pw060510p03q193 | FTN_1513 | X | X |            |
| tnfn1_pw060510p03q194 | FTN_1628 | X |   |            |
| tnfn1_pw060510p03q195 | FTN_1243 | X |   |            |
| tnfn1_pw060510p03q196 | FTN_0434 | X |   |            |
| tnfn1_pw060419p04q101 | FTN_0829 |   | X |            |
| tnfn1_pw060419p04q102 | FTN_1129 |   | X |            |
| tnfn1_pw060419p04q103 | FTN_0183 |   | X |            |
| tnfn1_pw060419p04q104 | FTN_0054 |   | X |            |
| tnfn1_pw060419p04q105 | FTN_1683 |   | X | X          |
| tnfn1_pw060419p04q106 | FTN_1627 |   | X |            |
| tnfn1_pw060419p04q107 | FTN_0022 |   | X | X          |
| tnfn1_pw060419p04q108 | FTN_1325 |   | X | X          |
| tnfn1_pw060419p04q109 | FTN_0910 |   | X |            |
| tnfn1_pw060419p04q110 | FTN_0048 |   | X |            |
| tnfn1_pw060419p04q111 | FTN_0580 |   | X |            |
| tnfn1_pw060419p04q112 | FTN_1000 |   | X | X          |

|                       |            |   |   |            |
|-----------------------|------------|---|---|------------|
| tnfn1_pw060419p04q113 | FTN_1435   | X |   |            |
| tnfn1_pw060419p04q114 | FTN_1361   | X | X |            |
| tnfn1_pw060419p04q115 | FTN_0384   | X |   |            |
| tnfn1_pw060419p04q116 | FTN_0287   | X | X |            |
| tnfn1_pw060419p04q117 | FTN_1156   | X |   |            |
| tnfn1_pw060419p04q118 | FTN_1172   | X |   |            |
| tnfn1_pw060419p04q119 | FTN_1024   | X |   |            |
| tnfn1_pw060419p04q120 | FTN_0413   | X |   |            |
| tnfn1_pw060419p04q121 | FTN_1104   | X | X |            |
| tnfn1_pw060419p04q122 | FTN_1459   | X |   |            |
| tnfn1_pw060419p04q123 | FTN_0530   | X | X | Genotype 4 |
| tnfn1_pw060419p04q124 | intergenic | X | X |            |
| tnfn1_pw060419p04q125 | FTN_1050   | X |   |            |
| tnfn1_pw060419p04q126 | FTN_0296   | X |   |            |
| tnfn1_pw060419p04q127 | FTN_1342   | X |   |            |
| tnfn1_pw060419p04q128 | FTN_0679   | X |   |            |
| tnfn1_pw060419p04q129 | FTN_1290   | X |   |            |
| tnfn1_pw060419p04q130 | FTN_1585   | X |   |            |
| tnfn1_pw060419p04q131 | FTN_1744   | X |   |            |
| tnfn1_pw060419p04q132 | FTN_1282   | X |   |            |
| tnfn1_pw060419p04q134 | FTN_0921   | X |   |            |
| tnfn1_pw060419p04q135 | FTN_1415   | X | X |            |
| tnfn1_pw060419p04q136 | FTN_1601   | X | X |            |
| tnfn1_pw060419p04q137 | FTN_0289   | X | X |            |
| tnfn1_pw060419p04q138 | FTN_1470   | X |   |            |
| tnfn1_pw060419p04q139 | FTN_1109   | X | X | Genotype 5 |
| tnfn1_pw060419p04q140 | FTN_1465   | X |   |            |
| tnfn1_pw060419p04q141 | FTN_1118   | X |   |            |
| tnfn1_pw060419p04q142 | FTN_0687   | X | X |            |
| tnfn1_pw060419p04q143 | FTN_0386   | X |   |            |
| tnfn1_pw060419p04q144 | FTN_0426   | X |   |            |
| tnfn1_pw060419p04q145 | FTN_0901   | X |   |            |
| tnfn1_pw060419p04q146 | FTN_0961   | X | X |            |
| tnfn1_pw060419p04q147 | FTN_0334   | X | X |            |
| tnfn1_pw060419p04q148 | intergenic | X |   |            |
| tnfn1_pw060419p04q149 | FTN_1502   | X |   |            |
| tnfn1_pw060419p04q150 | FTN_0003   | X |   |            |
| tnfn1_pw060419p04q151 | FTN_1258   | X | X |            |
| tnfn1_pw060419p04q152 | FTN_1017   | X |   | X          |
| tnfn1_pw060419p04q153 | FTN_0597   | X |   | X          |
| tnfn1_pw060419p04q154 | FTN_0550   | X |   | X          |
| tnfn1_pw060419p04q155 | FTN_1654   | X |   |            |
| tnfn1_pw060419p04q156 | FTN_0126   | X |   |            |
| tnfn1_pw060419p04q157 | FTN_0861   | X |   |            |
| tnfn1_pw060419p04q158 | FTN_1430   | X |   |            |
| tnfn1_pw060419p04q159 | FTN_0638   | X |   | X          |
| tnfn1_pw060419p04q160 | FTN_0144   | X |   | X          |
| tnfn1_pw060419p04q161 | FTN_0085   | X |   |            |
| tnfn1_pw060419p04q162 | FTN_1436   | X |   | X          |
| tnfn1_pw060419p04q163 | FTN_1532   | X |   |            |
| tnfn1_pw060419p04q164 | FTN_0692   | X |   |            |
| tnfn1_pw060419p04q165 | intergenic | X |   |            |
| tnfn1_pw060419p04q166 | FTN_0876   | X |   |            |

|                       |            |   |   |            |
|-----------------------|------------|---|---|------------|
| tnfn1_pw060419p04q167 | FTN_0620   | X | X |            |
| tnfn1_pw060419p04q168 | FTN_1091   | X |   |            |
| tnfn1_pw060419p04q169 | FTN_0761   | X | X |            |
| tnfn1_pw060419p04q170 | FTN_1762   | X |   |            |
| tnfn1_pw060419p04q171 | FTN_1252   | X |   |            |
| tnfn1_pw060419p04q172 | FTN_0757   | X |   |            |
| tnfn1_pw060419p04q173 | FTN_0868   | X |   |            |
| tnfn1_pw060419p04q174 | FTN_0272   | X |   |            |
| tnfn1_pw060419p04q175 | FTN_0973   | X |   |            |
| tnfn1_pw060419p04q176 | FTN_1728   | X |   |            |
| tnfn1_pw060419p04q177 | FTN_0595   | X | X |            |
| tnfn1_pw060419p04q178 | FTN_0028   | X |   |            |
| tnfn1_pw060419p04q179 | FTN_1001   | X |   |            |
| tnfn1_pw060419p04q180 | FTN_1682   | X | X | Genotype 6 |
| tnfn1_pw060419p04q182 | FTN_1716   | X |   |            |
| tnfn1_pw060419p04q183 | FTN_1240   | X |   |            |
| tnfn1_pw060419p04q184 | FTN_1540   | X | X |            |
| tnfn1_pw060419p04q185 | FTN_1616   | X | X |            |
| tnfn1_pw060419p04q186 | FTN_0745   | X |   |            |
| tnfn1_pw060419p04q187 | FTN_0777   | X |   |            |
| tnfn1_pw060419p04q188 | FTN_0925   | X | X |            |
| tnfn1_pw060419p04q189 | intergenic | X | X |            |
| tnfn1_pw060419p04q190 | FTN_0391   | X |   |            |
| tnfn1_pw060419p04q191 | FTN_0077   | X |   |            |
| tnfn1_pw060419p04q192 | FTN_1427   | X |   |            |
| tnfn1_pw060419p04q193 | FTN_1291   | X |   |            |
| tnfn1_pw060419p04q194 | FTN_0771   | X | X |            |
| tnfn1_pw060419p04q195 | FTN_0121   | X | X |            |
| tnfn1_pw060419p04q196 | FTN_1088   | X |   |            |
