# Supplementary material for: Restriction of Francisella novicida Genetic Diversity during Infection of the Vector Midgut
Source: PubMed Central journal article supplement (PMC4231110; doi:10.1371/journal.ppat.1004499), 2014-11-13
Supplement: ppat.1004499.s008.pdf [file ppat.1004499.s008.pdf]

| <i>F. novicida</i> transposon mutant | <i>F. novicida</i> locus tag | Mutant specific primer    |
|--------------------------------------|------------------------------|---------------------------|
| tnfn1_pw060510p03q102                | FTN_1172                     | gatttgattccaaggattatctc   |
| tnfn1_pw060510p03q103                | FTN_0526                     | cctttgtcactcatagcacttat   |
| tnfn1_pw060510p03q104                | FTN_0462                     | agaaagtataaagggtgcaattt   |
| tnfn1_pw060510p03q105                | FTN_1739                     | tttcatcaataaagtcagcaaac   |
| tnfn1_pw060510p03q106                | FTN_1359                     | atatctatcatcatcgcgtttg    |
| tnfn1_pw060510p03q107                | FTN_1427                     | ctttcattattcggccaag       |
| tnfn1_pw060510p03q108                | FTN_0084                     | tatgaaattagactccatcaagc   |
| tnfn1_pw060510p03q109                | FTN_1486                     | gttatttagttgattggcaaag    |
| tnfn1_pw060510p03q110                | FTN_1727                     | atgttgagctttcaggatcttat   |
| tnfn1_pw060510p03q111                | FTN_0515                     | cgtattgtgttaggtatctgg     |
| tnfn1_pw060510p03q112                | FTN_0841                     | taagacgtggttctcaactaaa    |
| tnfn1_pw060510p03q113                | FTN_0669                     | catcatatttgtgaaagattgct   |
| tnfn1_pw060510p03q114                | FTN_0284                     | ctgaattactcattagcctctcc   |
| tnfn1_pw060510p03q115                | FTN_0625                     | ctcatcttgattctaaatggag    |
| tnfn1_pw060510p03q116                | intergenic                   | taaatacagggtgagctaataccg  |
| tnfn1_pw060510p03q117                | FTN_0143                     | gtcttaggagctgaaattgactt   |
| tnfn1_pw060510p03q118                | FTN_1717                     | cttcagatagtgcaacgac       |
| tnfn1_pw060510p03q119                | FTN_0806                     | ggcttactcagataatccaat     |
| tnfn1_pw060510p03q120                | FTN_0303                     | atttgagttaccttagcgact     |
| tnfn1_pw060510p03q121                | FTN_1699                     | ttatcttgctcttgaccatcta    |
| tnfn1_pw060510p03q122                | FTN_1229                     | ttagggtgattcgtatgctatg    |
| tnfn1_pw060510p03q123                | FTN_1177                     | agagctgattgttccaatagt     |
| tnfn1_pw060510p03q124                | FTN_0399                     | tcctatatgtcagtggtgaagag   |
| tnfn1_pw060510p03q125                | FTN_0127                     | gattcaagtgttattggcataga   |
| tnfn1_pw060510p03q126                | FTN_0629                     | tcacaaactctactctcatgctc   |
| tnfn1_pw060510p03q127                | FTN_0619                     | aaagtctgtctaacggatcatagc  |
| tnfn1_pw060510p03q128                | FTN_1418                     | agcataattgtattggatcatt    |
| tnfn1_pw060510p03q129                | FTN_1060                     | gaagcggtaaatacaggtaaata   |
| tnfn1_pw060510p03q130                | FTN_1107                     | tttcattgtcatttaaggctcta   |
| tnfn1_pw060510p03q131                | FTN_0521                     | tctctatgttagtatcggtcca    |
| tnfn1_pw060510p03q132                | FTN_1463                     | tcatgtaagccttgttgata      |
| tnfn1_pw060510p03q133                | FTN_1726                     | tgcatccgattatagacatatt    |
| tnfn1_pw060510p03q134                | FTN_0657                     | gccaatgagtaattattgtttg    |
| tnfn1_pw060510p03q135                | FTN_1254                     | ttgtttatattctccagttgaca   |
| tnfn1_pw060510p03q136                | intergenic                   | catttagttggttagacattatcaa |
| tnfn1_pw060510p03q137                | FTN_0070                     | cctataaagatgctgaaatgaca   |
| tnfn1_pw060510p03q139                | FTN_0969                     | ctttaatataacgccaatacga    |
| tnfn1_pw060510p03q140                | FTN_0741                     | agcatactaagattatcctggag   |
| tnfn1_pw060510p03q141                | FTN_1493                     | acaccttatcattcttggttaa    |
| tnfn1_pw060510p03q142                | FTN_0533                     | aaattatagaagaagcgccaata   |
| tnfn1_pw060510p03q143                | FTN_1356                     | gctatttcattctcataattcca   |
| tnfn1_pw060510p03q144                | FTN_0171                     | ggtaggtcactgtttaatgct     |
| tnfn1_pw060510p03q145                | FTN_1309                     | ttgatttgggcttaatagaaagt   |
| tnfn1_pw060510p03q146                | FTN_1152                     | actaaatccttgaaatgggaat    |
| tnfn1_pw060510p03q147                | FTN_1063                     | atttgaggatgcttagcagaat    |
| tnfn1_pw060510p03q148                | FTN_1176                     | gagaatgccttagtgatagttga   |
| tnfn1_pw060510p03q149                | FTN_1168                     | aaatctgtagttatccgcttc     |
| tnfn1_pw060510p03q150                | FTN_0949                     | tagagagtaagtcgttcagcag    |

|                       |          |                          |
|-----------------------|----------|--------------------------|
| tnfn1_pw060510p03q151 | FTN_0583 | tattccatttcattaagacaca   |
| tnfn1_pw060510p03q152 | FTN_0674 | ggaatctttatcagcattacaag  |
| tnfn1_pw060510p03q153 | FTN_1372 | ttcagacatatacagcctttgat  |
| tnfn1_pw060510p03q154 | FTN_0516 | ccaactttgtgaactaatggtaa  |
| tnfn1_pw060510p03q155 | FTN_0750 | cctgtatcaaggatgcaagtt    |
| tnfn1_pw060510p03q156 | FTN_0787 | tgcatacctaaactcagcttg    |
| tnfn1_pw060510p03q157 | FTN_0316 | ttgtgtgctagagaaagaattt   |
| tnfn1_pw060510p03q158 | FTN_1294 | ttaacttcttgaatcagcaaga   |
| tnfn1_pw060510p03q159 | FTN_1051 | gttaaatcagcattaagttcacg  |
| tnfn1_pw060510p03q160 | FTN_1759 | tcatataaatcgctccacctaata |
| tnfn1_pw060510p03q161 | FTN_0027 | ctttgatgatgggtcatatagag  |
| tnfn1_pw060510p03q162 | FTN_0177 | gcgctctatctgtaacaacttta  |
| tnfn1_pw060510p03q163 | FTN_0857 | gaatttgctataataaccgccta  |
| tnfn1_pw060510p03q164 | FTN_0116 | catattaagtgaagaggaacctg  |
| tnfn1_pw060510p03q165 | FTN_0685 | tatgcagagtcagctaaattatg  |
| tnfn1_pw060510p03q166 | FTN_1439 | aatcgctactgtagctctggatt  |
| tnfn1_pw060510p03q168 | FTN_0598 | gttaaatgtcgtattggctatga  |
| tnfn1_pw060510p03q169 | FTN_0626 | ctttgttggttagctgtaattg   |
| tnfn1_pw060510p03q170 | FTN_0687 | ttgatttaagtgttgagcaaagt  |
| tnfn1_pw060510p03q171 | FTN_0588 | aatatcaactcagcctgtttctt  |
| tnfn1_pw060510p03q172 | FTN_0527 | aaataatgttgccacgatgt     |
| tnfn1_pw060510p03q173 | FTN_1161 | atggcttaaattatcagatgttg  |
| tnfn1_pw060510p03q174 | FTN_1594 | tttagcatttgagcgaattatta  |
| tnfn1_pw060510p03q175 | FTN_1732 | ttaccattcgctgctattactac  |
| tnfn1_pw060510p03q176 | FTN_0531 | tgccctactgtttcatataatgc  |
| tnfn1_pw060510p03q177 | FTN_0488 | caacaagattggcaaagtagta   |
| tnfn1_pw060510p03q178 | FTN_0898 | aatttagtcgtcacagattcaac  |
| tnfn1_pw060510p03q179 | FTN_1079 | tatttctgtaggtttcgtgactg  |
| tnfn1_pw060510p03q180 | FTN_0067 | caaagttgctgttattactgagc  |
| tnfn1_pw060510p03q181 | FTN_1589 | agaaggcgaaataattggatatag |
| tnfn1_pw060510p03q182 | FTN_0125 | caactcgctagactatctcctt   |
| tnfn1_pw060510p03q183 | FTN_1264 | gttgatggataaatgagagttt   |
| tnfn1_pw060510p03q184 | FTN_1715 | tgtaaaactaaacctgcaatact  |
| tnfn1_pw060510p03q185 | FTN_1543 | caggtgcatataagactattgga  |
| tnfn1_pw060510p03q186 | FTN_1417 | ccagatggcttagatgcaata    |
| tnfn1_pw060510p03q187 | FTN_0178 | aacggttcatttcaaca        |
| tnfn1_pw060510p03q188 | FTN_0627 | taatccaaatagtgttcagatt   |
| tnfn1_pw060510p03q189 | FTN_0285 | ctatattgttggtctgtagtg    |
| tnfn1_pw060510p03q190 | FTN_0371 | tttgaatgggctttatgatatg   |
| tnfn1_pw060510p03q191 | FTN_0973 | acaaacttctccatgctcttc    |
| tnfn1_pw060510p03q192 | FTN_1098 | tttcatcacagctataaataccg  |
| tnfn1_pw060510p03q193 | FTN_1513 | taactatcaaagggatctattgc  |
| tnfn1_pw060510p03q194 | FTN_1628 | atgtatcttatgtgcttcaatgg  |
| tnfn1_pw060510p03q195 | FTN_1243 | agttaagatagggatgctgctac  |
| tnfn1_pw060510p03q196 | FTN_0434 | aaatatcgactctctgctgata   |
| tnfn1_pw060419p04q101 | FTN_0829 | ctagaacatcggcatagatttc   |
| tnfn1_pw060419p04q102 | FTN_1129 | cttgaagagtcgccatactttat  |
| tnfn1_pw060419p04q103 | FTN_0183 | gctgtgattggttattatagcc   |
| tnfn1_pw060419p04q104 | FTN_0054 | ataatcatctctcctggcatagt  |

|                       |            |                            |
|-----------------------|------------|----------------------------|
| tnfn1_pw060419p04q105 | FTN_1683   | aaagaagggttgagatactttc     |
| tnfn1_pw060419p04q106 | FTN_1627   | actcaaacatagtcaccaaga      |
| tnfn1_pw060419p04q107 | FTN_0022   | gtcattattggtattggtgaaa     |
| tnfn1_pw060419p04q108 | FTN_1325   | tgagtttgtagtgatagtgactt    |
| tnfn1_pw060419p04q109 | FTN_0910   | ttagtcaagccacaagtacc       |
| tnfn1_pw060419p04q110 | FTN_0048   | catgcttgtaaactaatgatgga    |
| tnfn1_pw060419p04q111 | FTN_0580   | gcagcttgggatagtaaataatg    |
| tnfn1_pw060419p04q112 | FTN_1000   | ataagcaacaatctccacagaat    |
| tnfn1_pw060419p04q113 | FTN_1435   | tggtgcttcatctgtaaagtat     |
| tnfn1_pw060419p04q114 | FTN_1361   | ttgggtttattgctgtaatg       |
| tnfn1_pw060419p04q115 | FTN_0384   | tttctatgatggtaaagtggtc     |
| tnfn1_pw060419p04q116 | FTN_0287   | atggcaaagaaattattatgagc    |
| tnfn1_pw060419p04q117 | FTN_1156   | acaaatagctgatgtgaaagag     |
| tnfn1_pw060419p04q118 | FTN_1172   | tttatagtgatagccaaggtagc    |
| tnfn1_pw060419p04q119 | FTN_1024   | caactgctcgtaagtactaat      |
| tnfn1_pw060419p04q120 | FTN_0413   | ctctatcgacattactgctgag     |
| tnfn1_pw060419p04q121 | FTN_1104   | tgagggtgtaatggctaaataatga  |
| tnfn1_pw060419p04q122 | FTN_1459   | gcacgttcgctagataaaactac    |
| tnfn1_pw060419p04q123 | FTN_0530   | cattatcatccttagcgtttag     |
| tnfn1_pw060419p04q124 | intergenic | cattagtttagttgggttagattt   |
| tnfn1_pw060419p04q125 | FTN_1050   | tcagataaatataccctagcaa     |
| tnfn1_pw060419p04q126 | FTN_0296   | atctccgatatgccagttc        |
| tnfn1_pw060419p04q127 | FTN_1342   | agttatagacgcatggttcctt     |
| tnfn1_pw060419p04q128 | FTN_0679   | tttagggtttatatgagctatcg    |
| tnfn1_pw060419p04q129 | FTN_1290   | aagtgcttattatccctttgc      |
| tnfn1_pw060419p04q130 | FTN_1585   | cccaaaccagtaatttcatttat    |
| tnfn1_pw060419p04q131 | FTN_1744   | acaactggcttacctcaaactat    |
| tnfn1_pw060419p04q132 | FTN_1282   | aaagttgttctgaaactcaaac     |
| tnfn1_pw060419p04q134 | FTN_0921   | attcttggcttattaccattgat    |
| tnfn1_pw060419p04q135 | FTN_1415   | cagcatggtactttagaattgag    |
| tnfn1_pw060419p04q136 | FTN_1601   | tatgacatctgacaaacttctg     |
| tnfn1_pw060419p04q137 | FTN_0289   | tcctcagtatcaactttctctg     |
| tnfn1_pw060419p04q138 | FTN_1470   | ttgtatcgttgtacttgcat       |
| tnfn1_pw060419p04q139 | FTN_1109   | tgagcttcaagtcctagatgata    |
| tnfn1_pw060419p04q140 | FTN_1465   | catctgtatatgccgctaact      |
| tnfn1_pw060419p04q141 | FTN_1118   | tgctttgagttgcctgtatag      |
| tnfn1_pw060419p04q142 | FTN_0687   | tactatcagggtgaaatgtagc     |
| tnfn1_pw060419p04q143 | FTN_0386   | aactttagtatctccaaattcaataa |
| tnfn1_pw060419p04q144 | FTN_0426   | atcgcatattcataactttcg      |
| tnfn1_pw060419p04q145 | FTN_0901   | ttgtaaagctggtaatatgctt     |
| tnfn1_pw060419p04q146 | FTN_0961   | aactaaatcatcatagccacca     |
| tnfn1_pw060419p04q147 | FTN_0334   | tttacctgatgaagacaaactaaa   |
| tnfn1_pw060419p04q148 | intergenic | gcaatctgtcttacttcatttg     |
| tnfn1_pw060419p04q149 | FTN_1502   | aagcagcaaataccgtagataac    |
| tnfn1_pw060419p04q150 | FTN_0003   | taaagtcataagaaaggcaacag    |
| tnfn1_pw060419p04q151 | FTN_1258   | atcaaatagcaagactccataaa    |
| tnfn1_pw060419p04q152 | FTN_1017   | tttagacatctgtatttactcacga  |
| tnfn1_pw060419p04q153 | FTN_0597   | taggaccacaagatgctaataaa    |
| tnfn1_pw060419p04q154 | FTN_0550   | ggtaggcttgaataaatgaagt     |

|                       |            |                           |
|-----------------------|------------|---------------------------|
| tnfn1_pw060419p04q155 | FTN_1654   | tagcaaatgatacacctaaaccag  |
| tnfn1_pw060419p04q156 | FTN_0126   | ctcgttggtatcatcagtatt     |
| tnfn1_pw060419p04q157 | FTN_0861   | ttagtaggaatcataaagcagttt  |
| tnfn1_pw060419p04q158 | FTN_1430   | aaacctttagctgccctcta      |
| tnfn1_pw060419p04q159 | FTN_0638   | taggtattcaagttaaagcgtca   |
| tnfn1_pw060419p04q160 | FTN_0144   | ttagtgataatccaacgctat     |
| tnfn1_pw060419p04q161 | FTN_0085   | atcagttggtacaagtagccttt   |
| tnfn1_pw060419p04q162 | FTN_1436   | ataatagcaatacgggtcaccttt  |
| tnfn1_pw060419p04q163 | FTN_1532   | ctgggtgatattggtgttggt     |
| tnfn1_pw060419p04q164 | FTN_0692   | accacaacttctctatcaggatt   |
| tnfn1_pw060419p04q165 | intergenic | aatcagaagcaagacataaaga    |
| tnfn1_pw060419p04q166 | FTN_0876   | accctatttaattccatctcttg   |
| tnfn1_pw060419p04q167 | FTN_0620   | agatagagcctaatagtgaacca   |
| tnfn1_pw060419p04q168 | FTN_1091   | tcaaggttgtagtgagatttg     |
| tnfn1_pw060419p04q169 | FTN_0761   | tcagttactagagagccatttgt   |
| tnfn1_pw060419p04q170 | FTN_1762   | gattgatctacataagccaaatg   |
| tnfn1_pw060419p04q171 | FTN_1252   | ccacagcattattaggagaatta   |
| tnfn1_pw060419p04q172 | FTN_0757   | ttacagaaactattgccactg     |
| tnfn1_pw060419p04q173 | FTN_0868   | tagtttcatcgcttctatattacca |
| tnfn1_pw060419p04q174 | FTN_0272   | caggaatcattgttctactaat    |
| tnfn1_pw060419p04q175 | FTN_0973   | catagactggtagctgcatag     |
| tnfn1_pw060419p04q176 | FTN_1728   | taaagcagaagacctgtatgt     |
| tnfn1_pw060419p04q177 | FTN_0595   | ttagctgctgttgatgatattt    |
| tnfn1_pw060419p04q178 | FTN_0028   | caatgatgcactaaactttgact   |
| tnfn1_pw060419p04q179 | FTN_1001   | tagtagcatctgtaagtgaagc    |
| tnfn1_pw060419p04q180 | FTN_1682   | cttaaagcagcgcatacaat      |
| tnfn1_pw060419p04q182 | FTN_1716   | tattgctaagtatttcgtggca    |
| tnfn1_pw060419p04q183 | FTN_1240   | aaagaaccagtttattgcgta     |
| tnfn1_pw060419p04q184 | FTN_1540   | gcttgtaaataagggcatatagtt  |
| tnfn1_pw060419p04q185 | FTN_1616   | agtcaaagagcgaatcattt      |
| tnfn1_pw060419p04q186 | FTN_0745   | taacaagtgcccaacaggta      |
| tnfn1_pw060419p04q187 | FTN_0777   | aattatagaagaagagcgacgac   |
| tnfn1_pw060419p04q188 | FTN_0925   | ataaatatgaaattggtgatcaaa  |
| tnfn1_pw060419p04q189 | intergenic | cagacataaccgcaactctg      |
| tnfn1_pw060419p04q190 | FTN_0391   | ttatgctgcttatatcttcta     |
| tnfn1_pw060419p04q191 | FTN_0077   | actatttacttgggttgtgcat    |
| tnfn1_pw060419p04q192 | FTN_1427   | tacatgataagccagagagacc    |
| tnfn1_pw060419p04q193 | FTN_1291   | tgagtgccttatactgtatttgc   |
| tnfn1_pw060419p04q194 | FTN_0771   | agcttcaactatcatcatctt     |
| tnfn1_pw060419p04q195 | FTN_0121   | gcttctgatctcctaactctcat   |
| tnfn1_pw060419p04q196 | FTN_1088   | aaattggaaagctaattggttg    |
| universal primer      | n/a        | tcagaattggttaattggttg     |
